# Supplementary material for: The immune microenvironment in non‐small cell lung cancer is predictive of prognosis after surgery
Source: PubMed Central journal article supplement (PMC6487716; doi:10.1002/1878-0261.12475), 2019-04-10

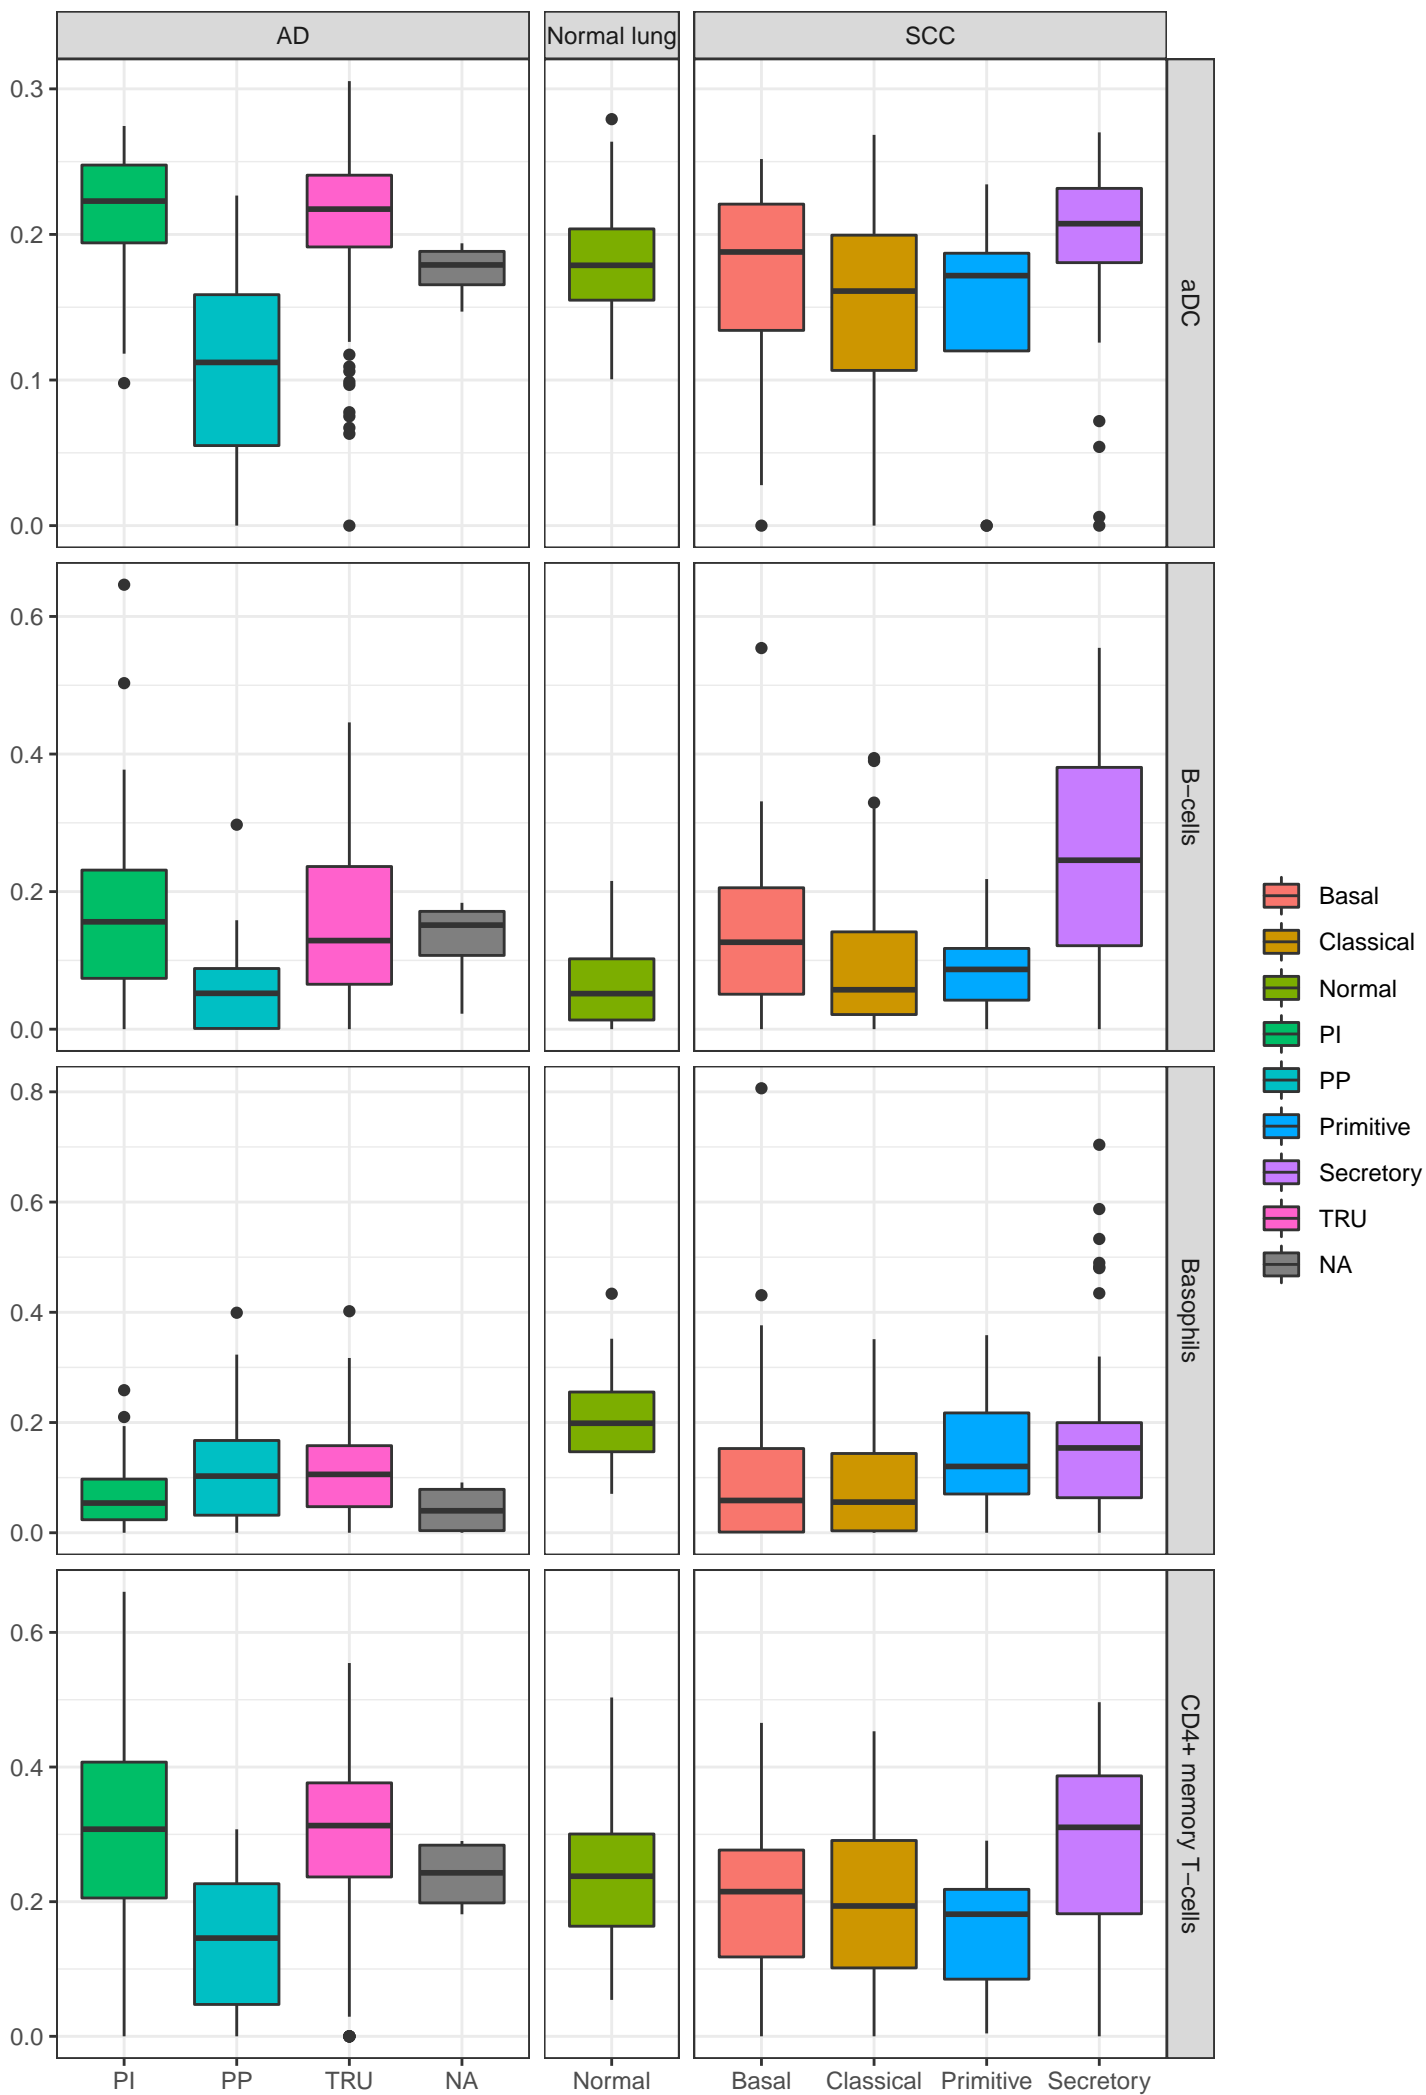

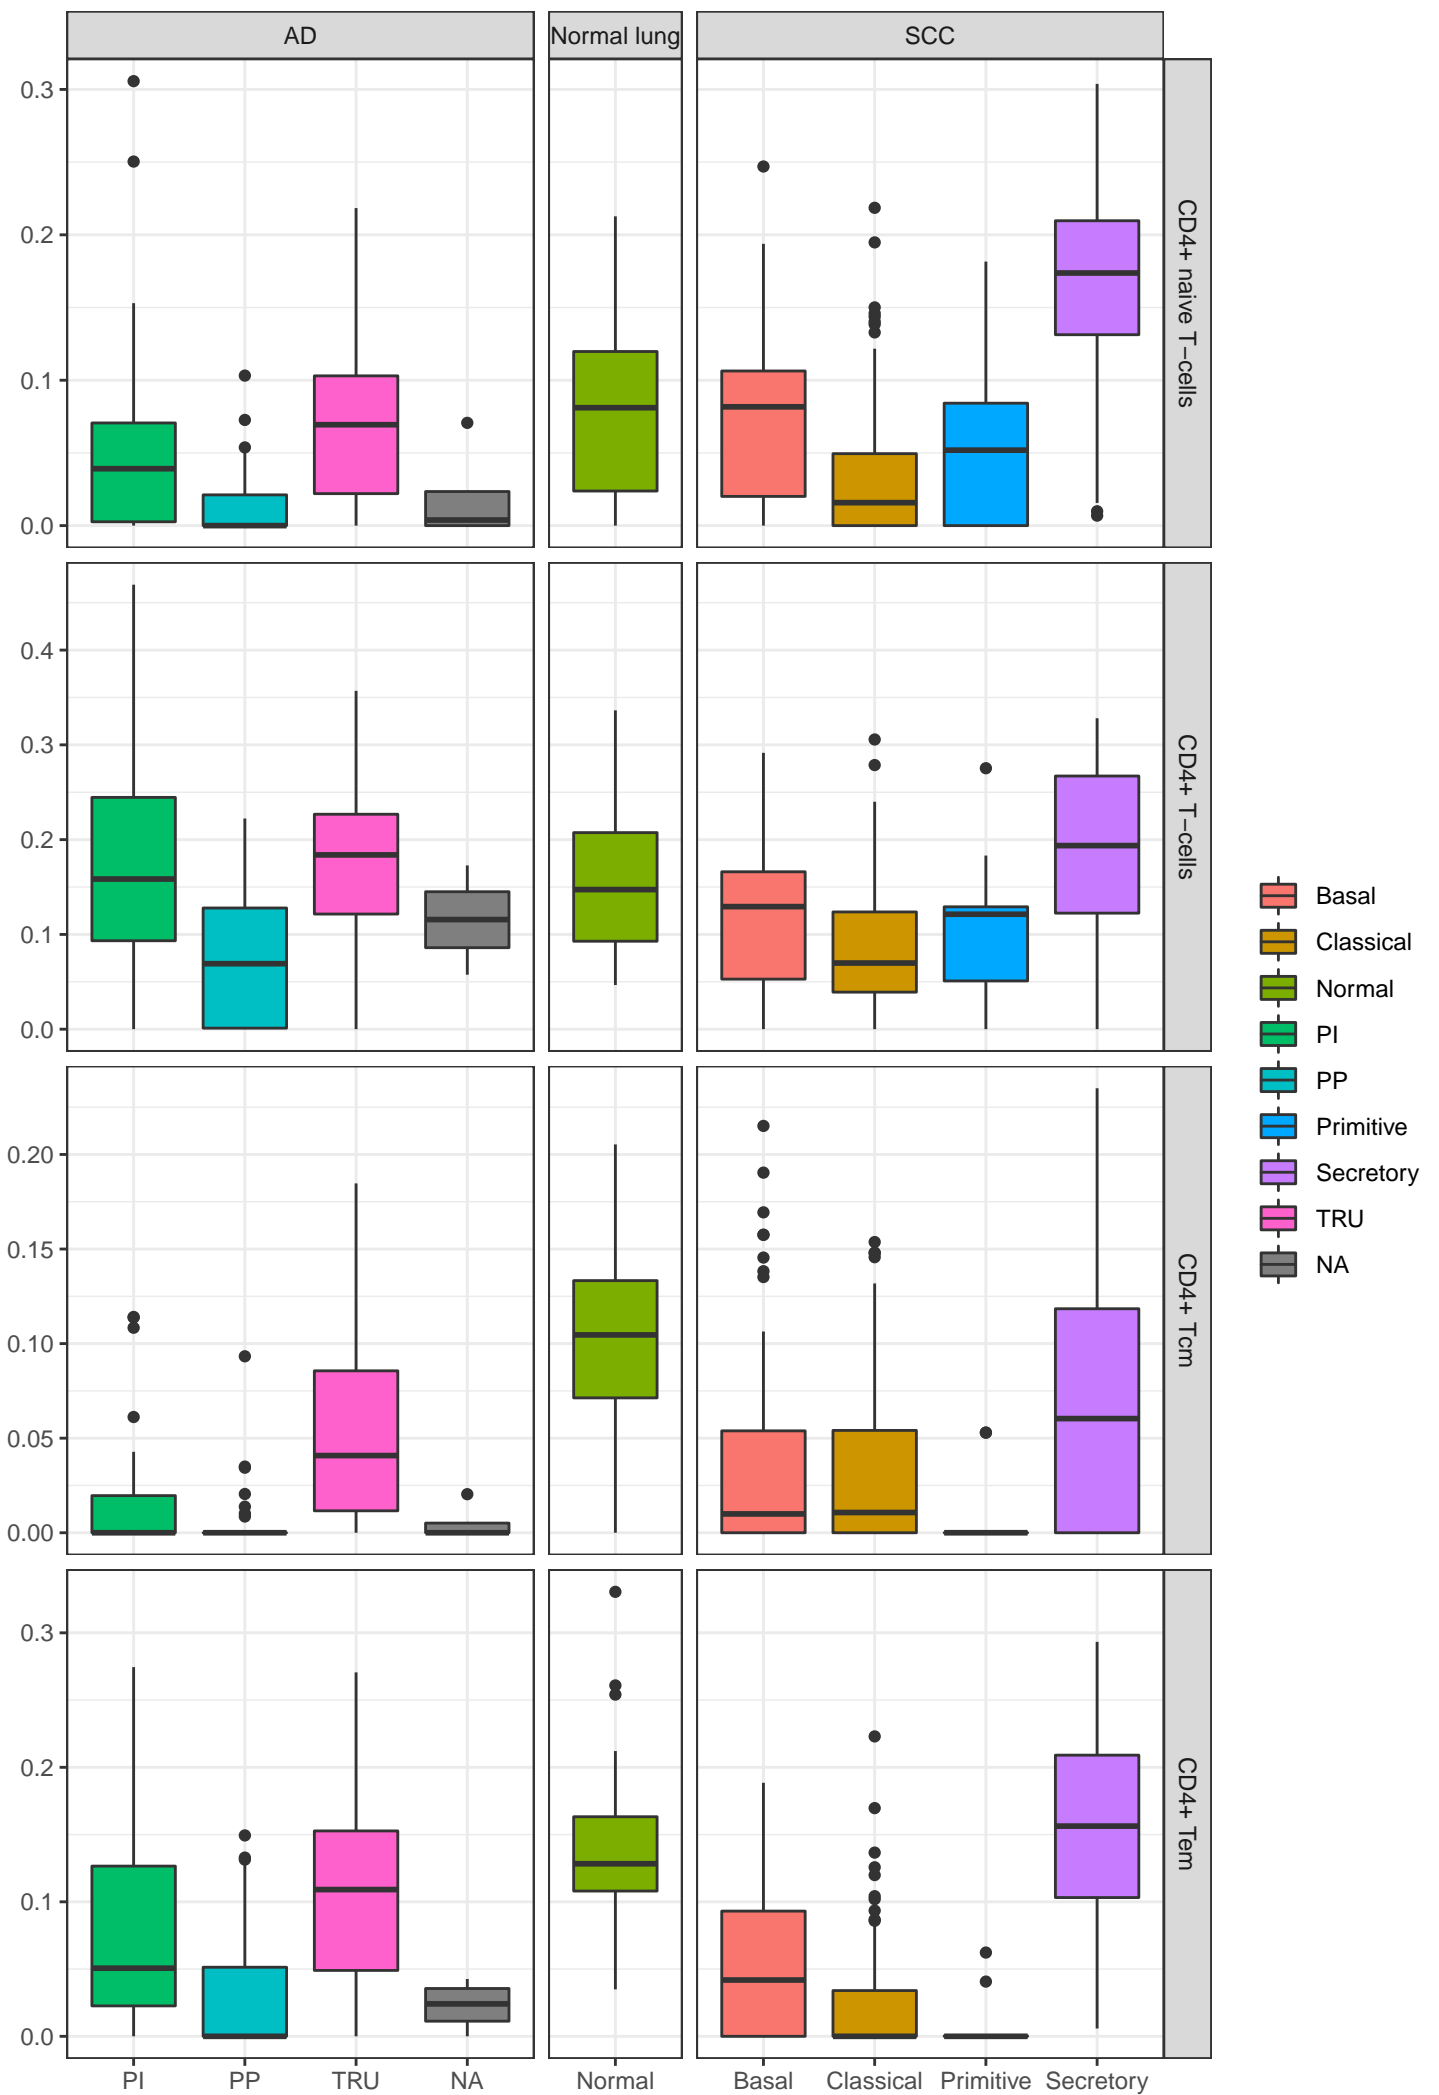

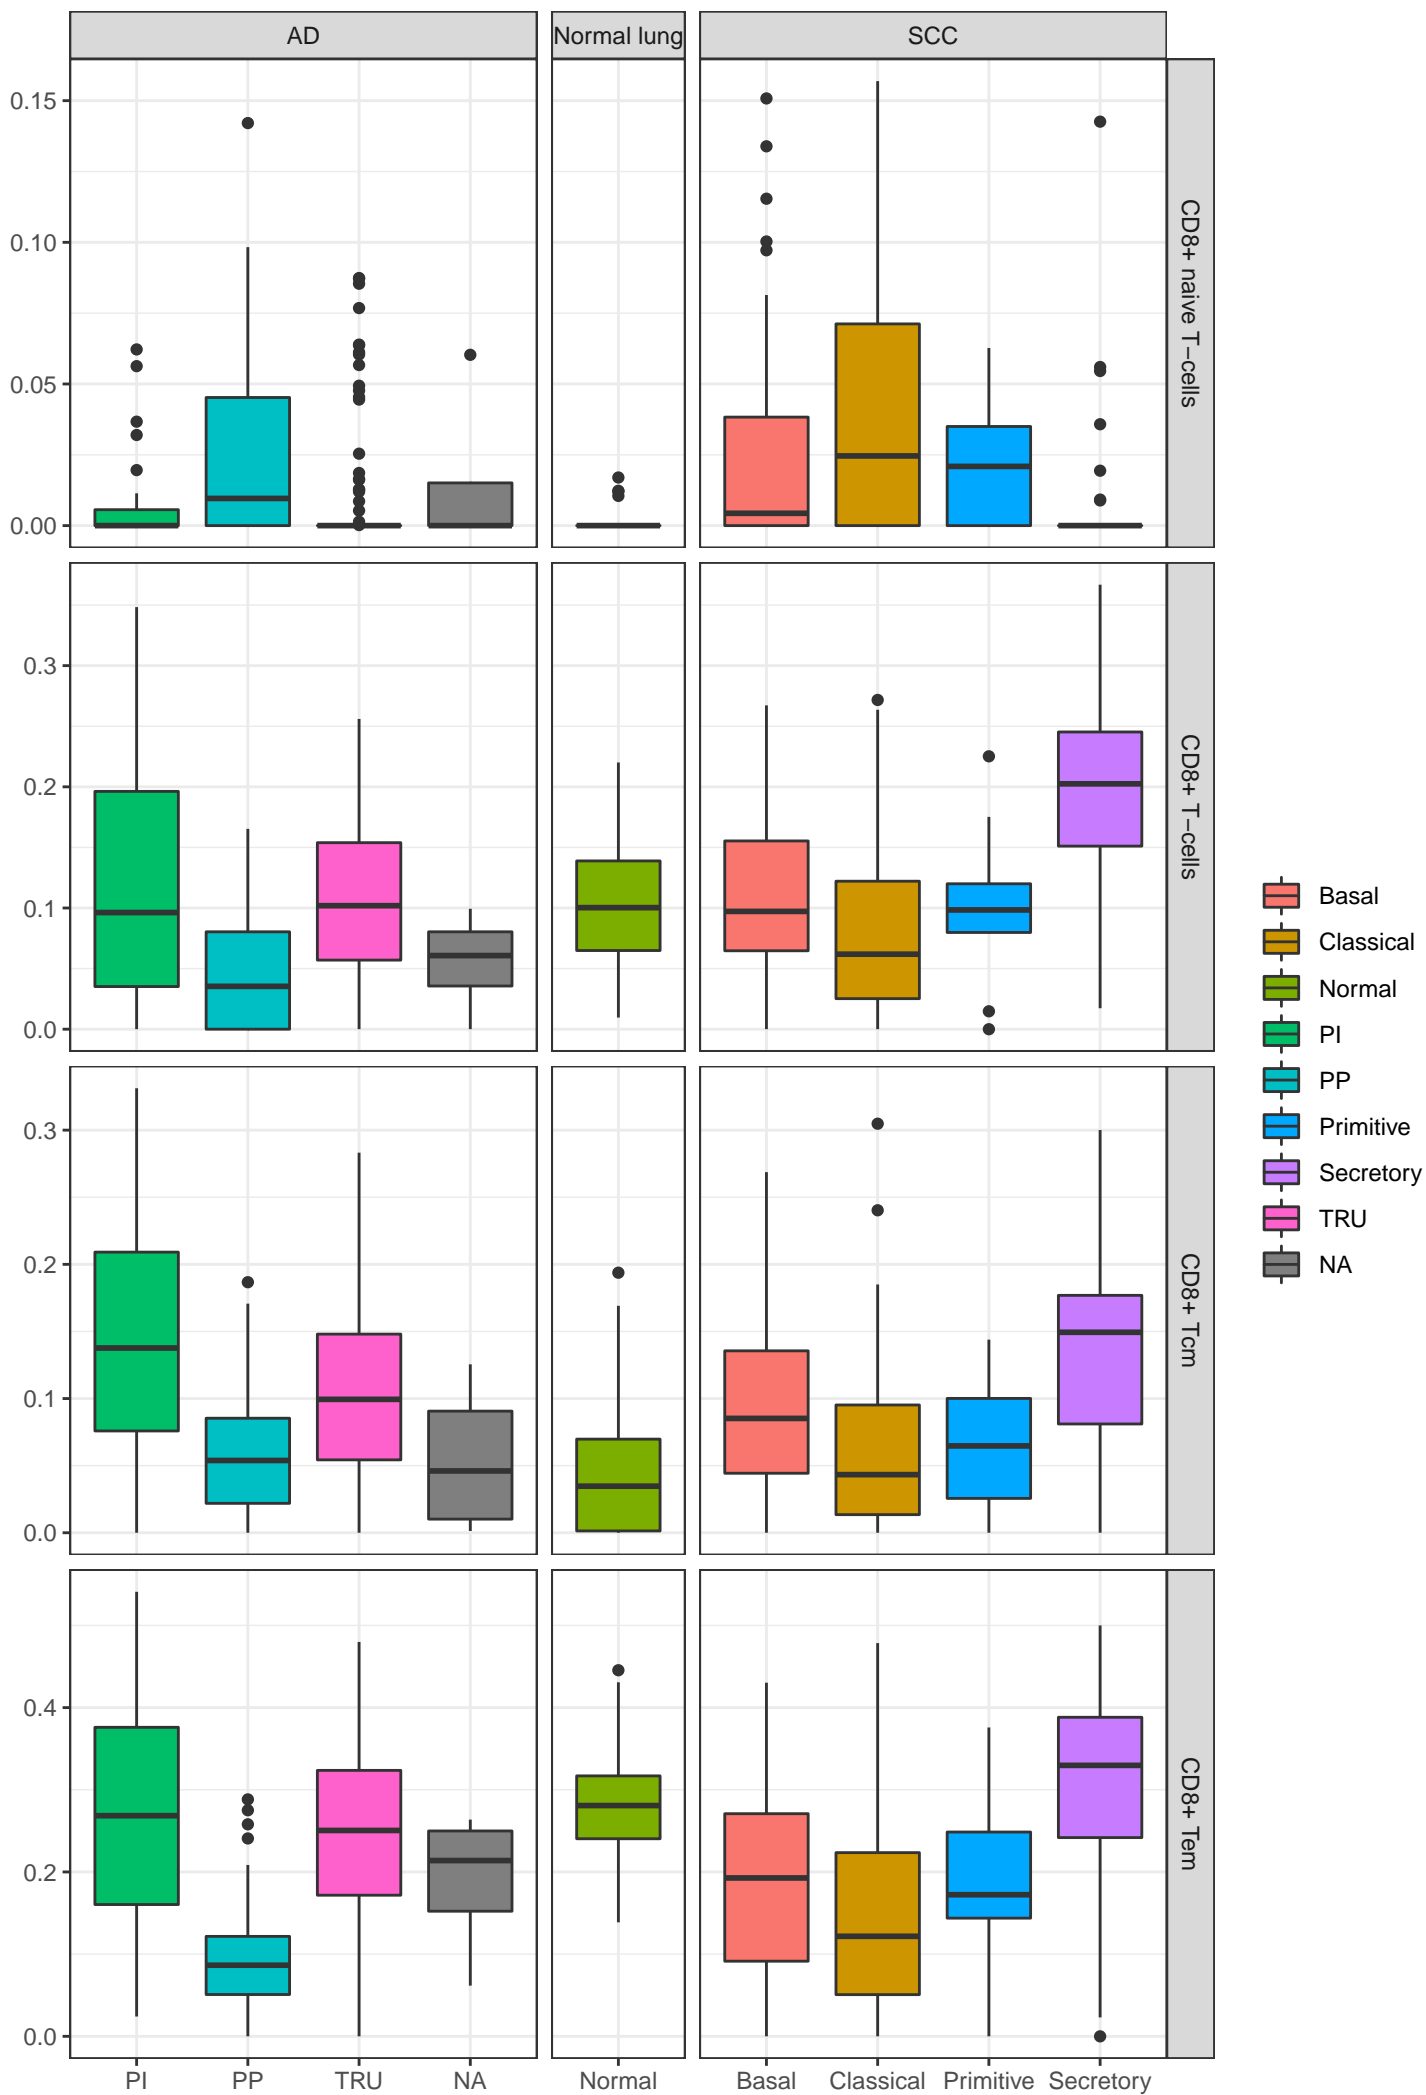

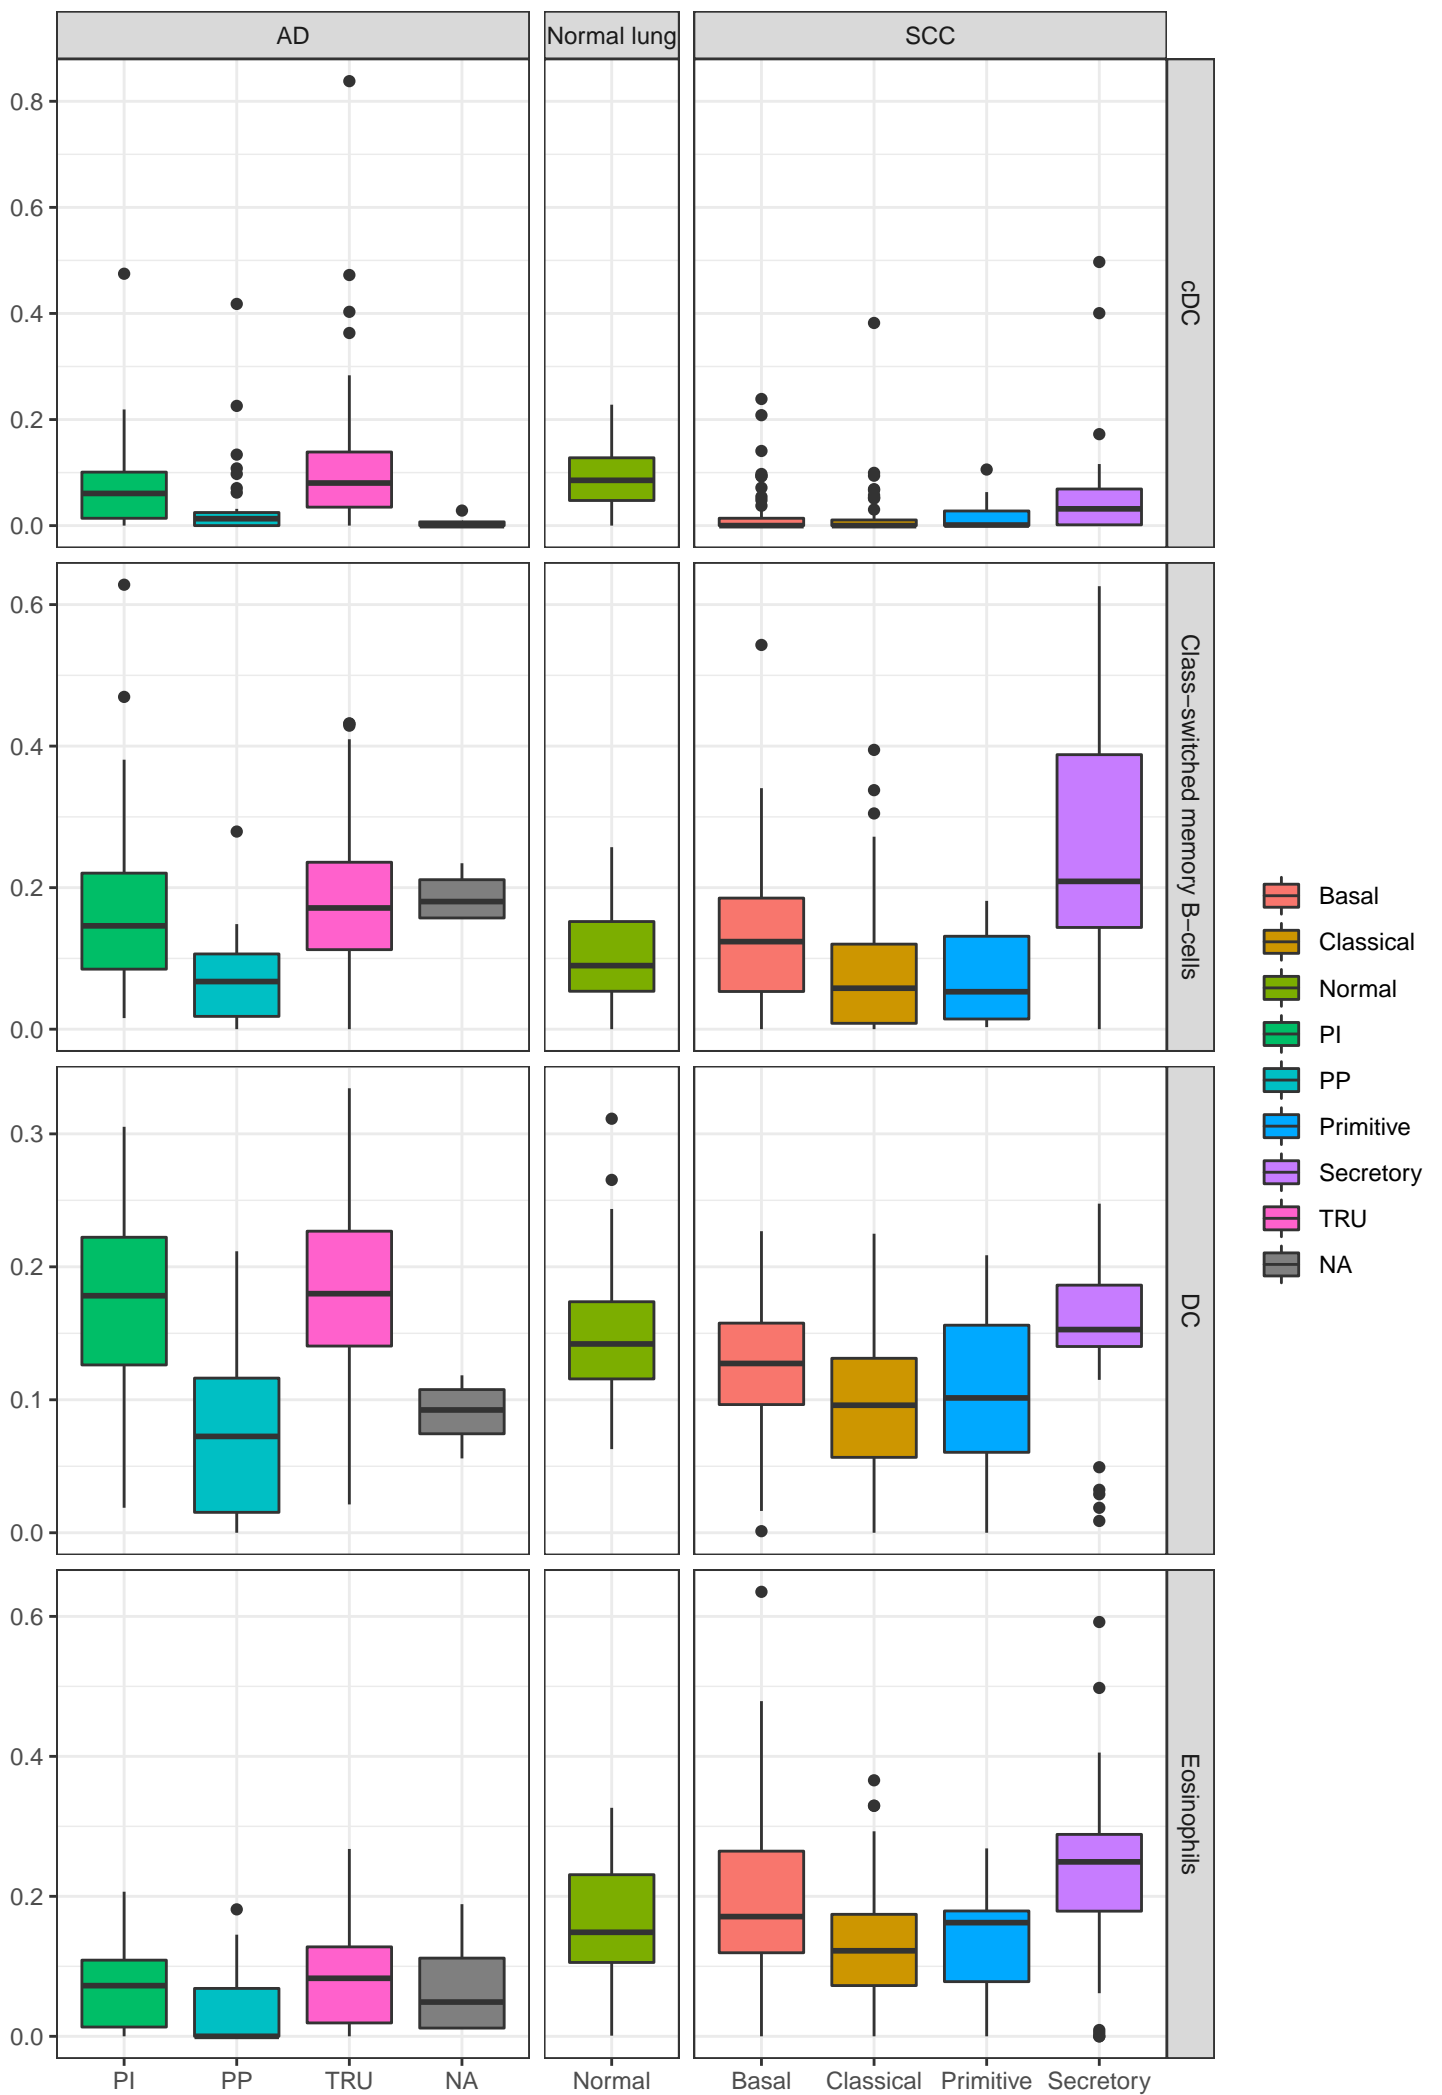

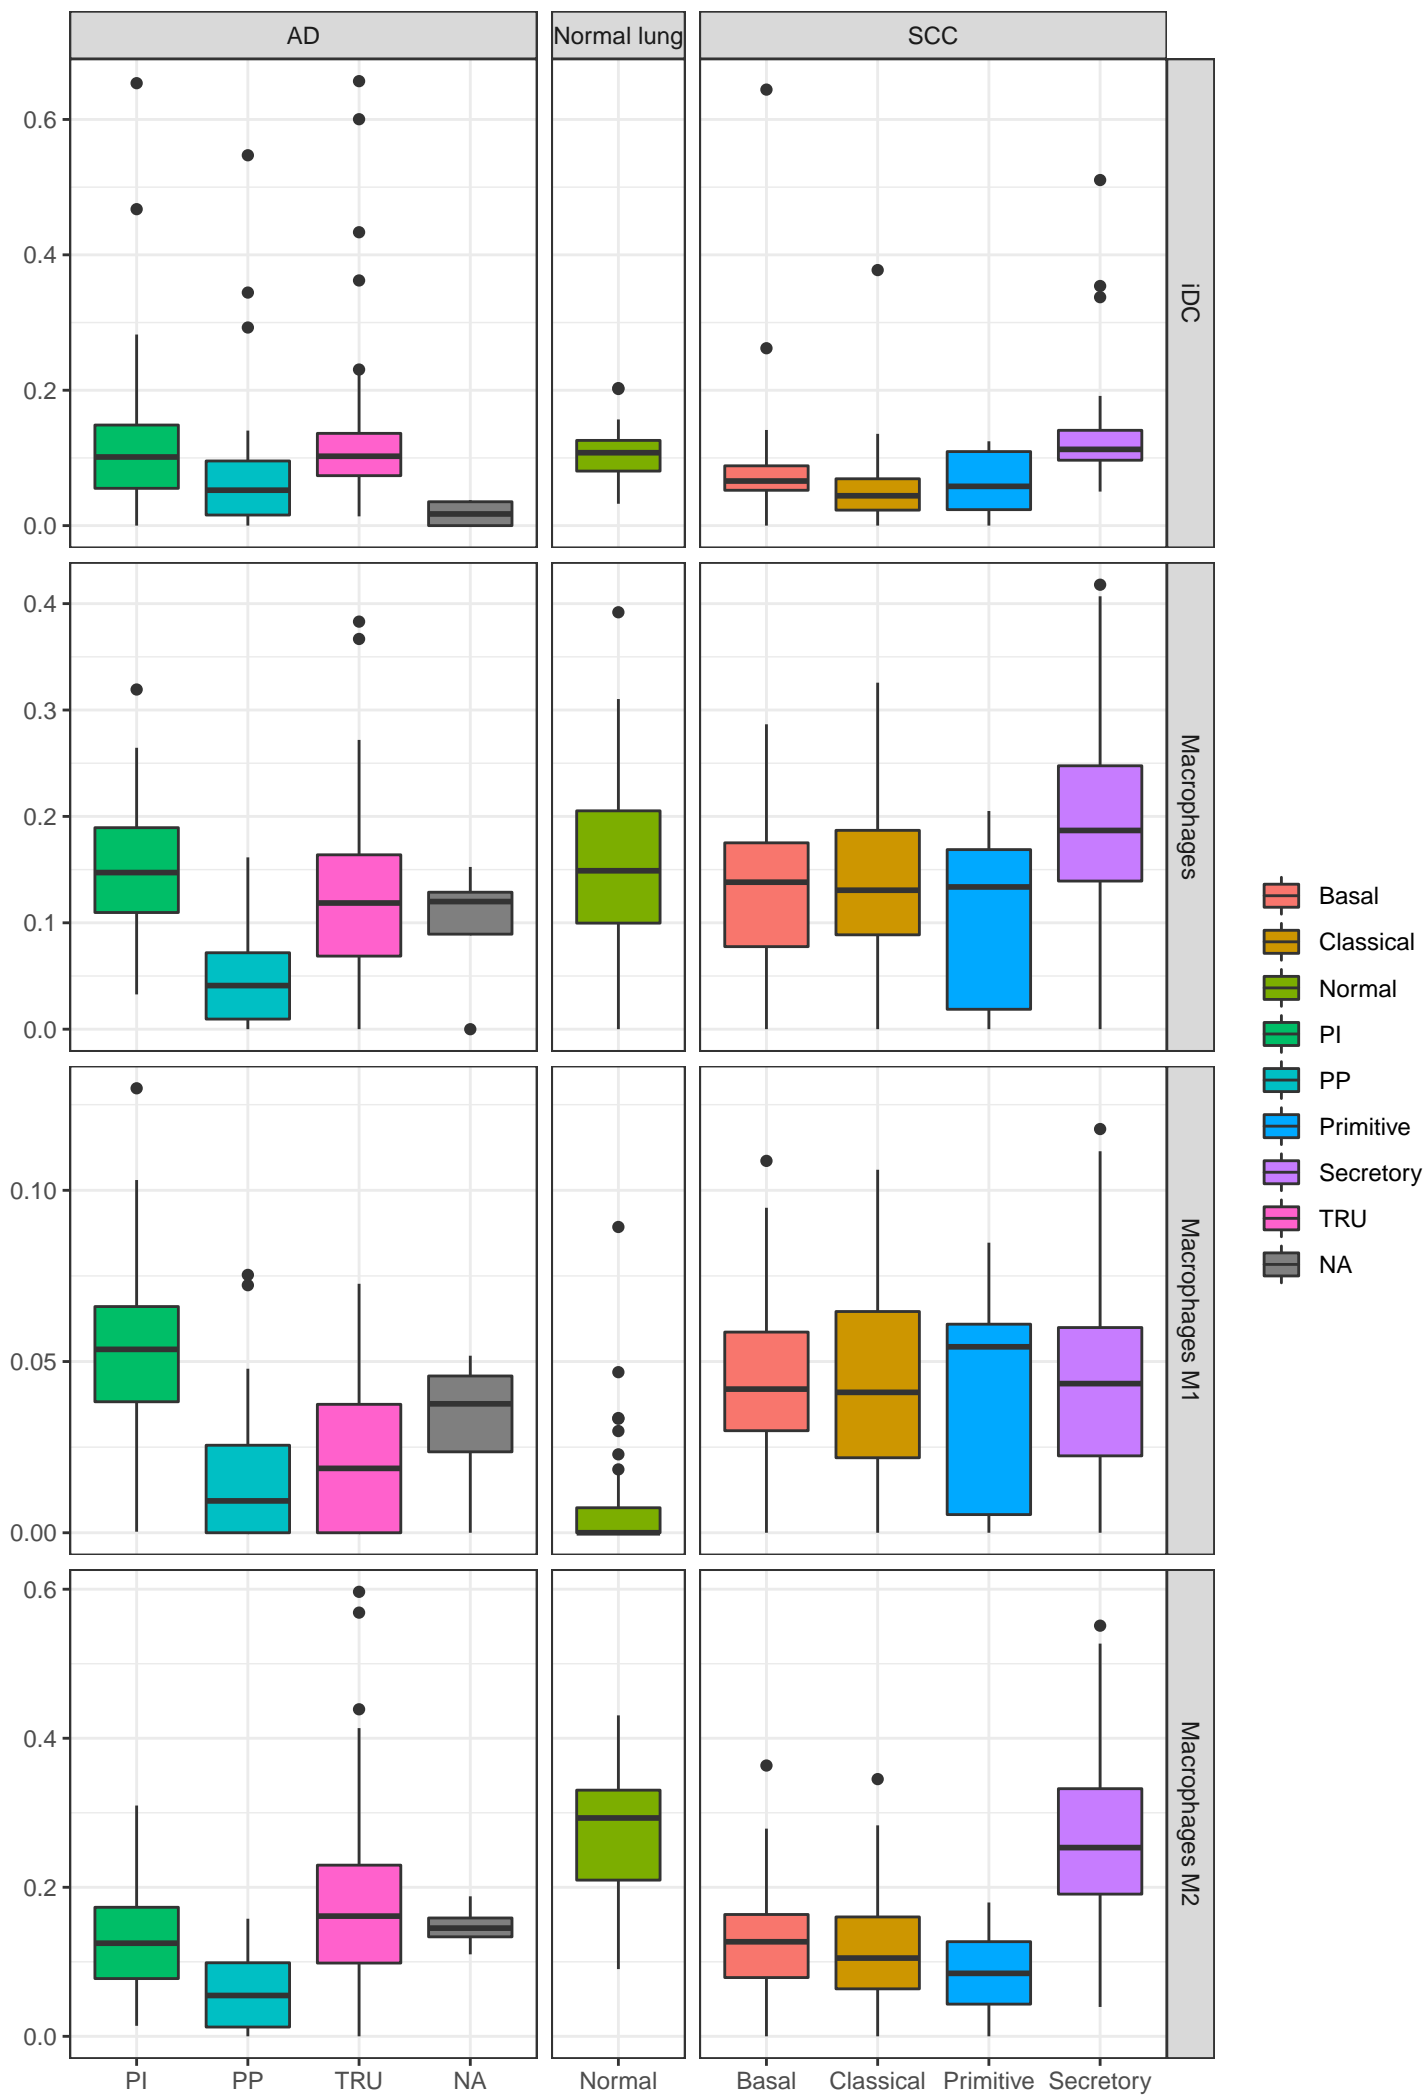

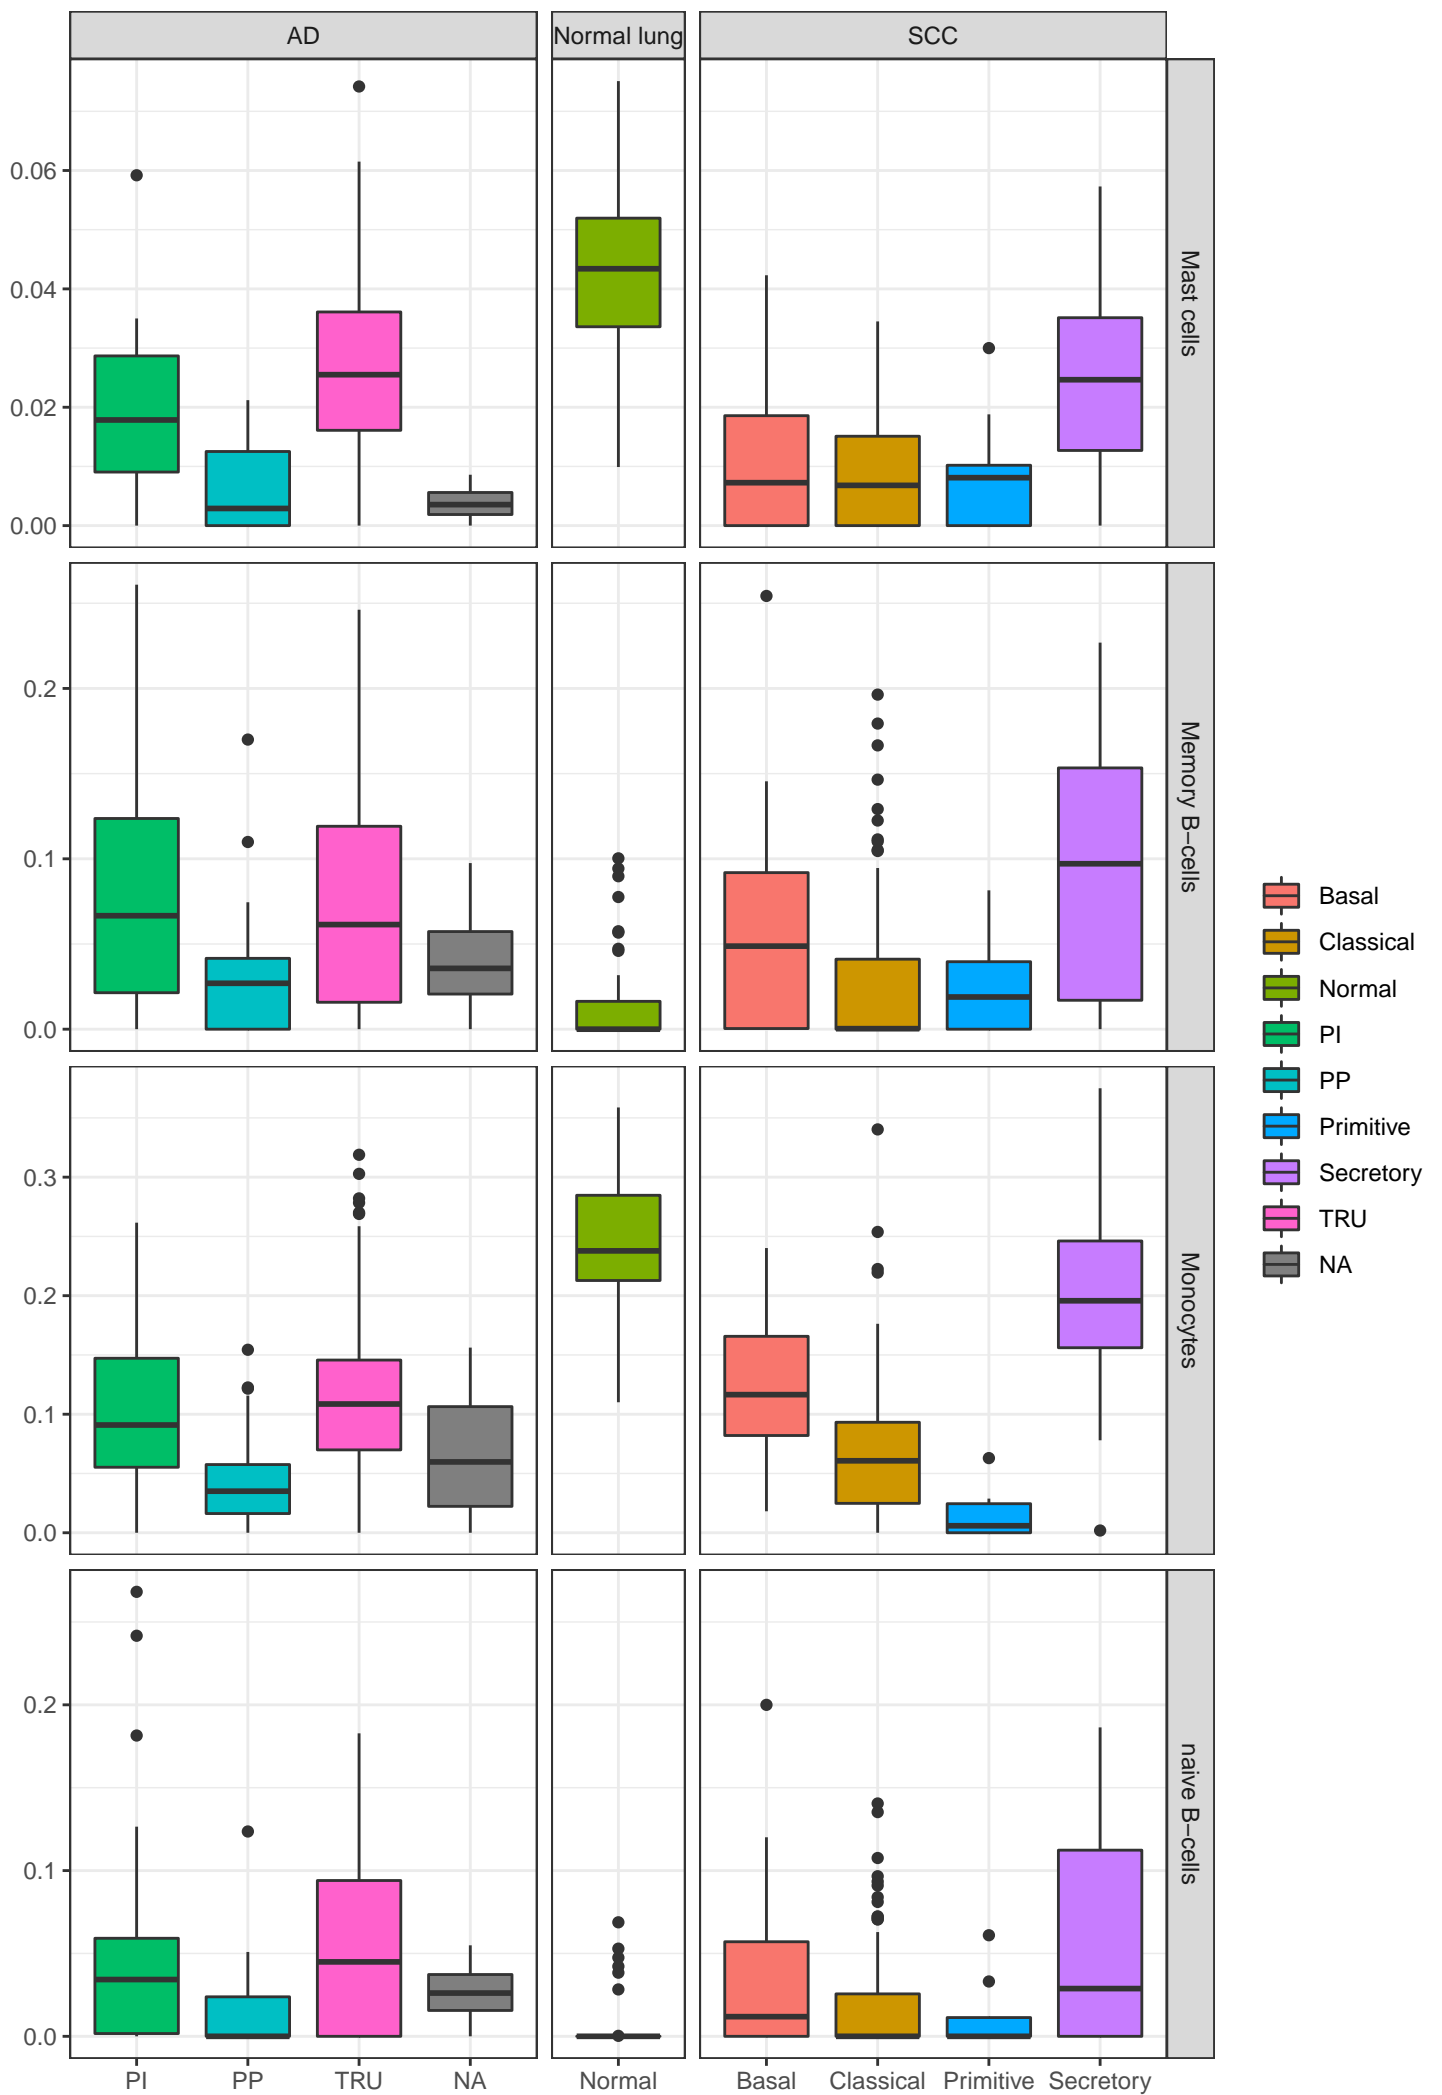

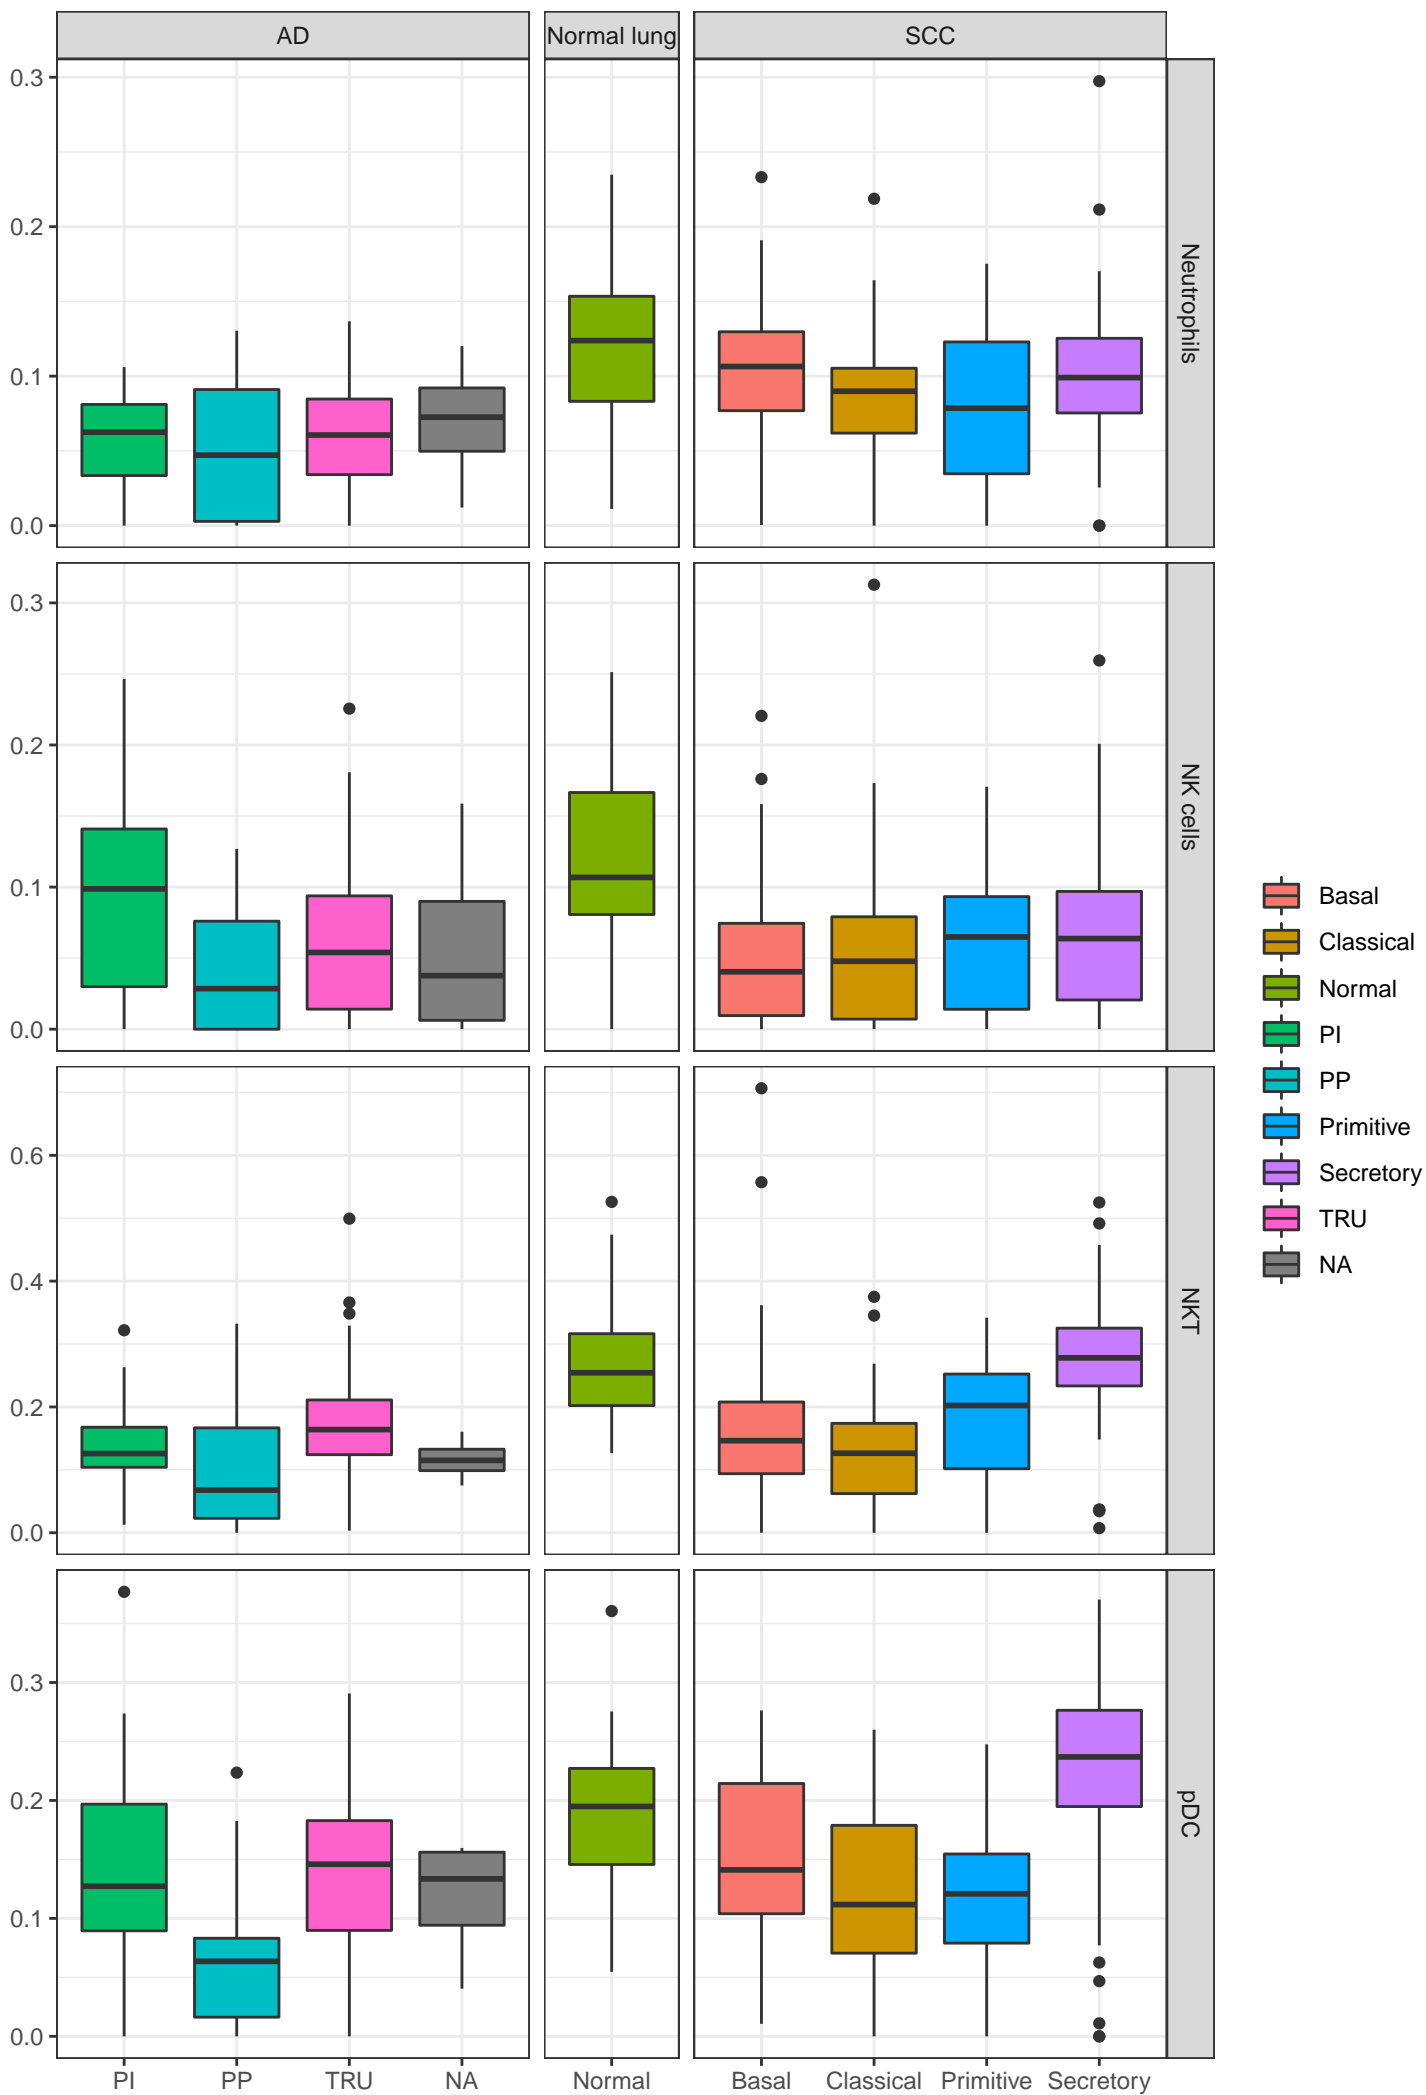

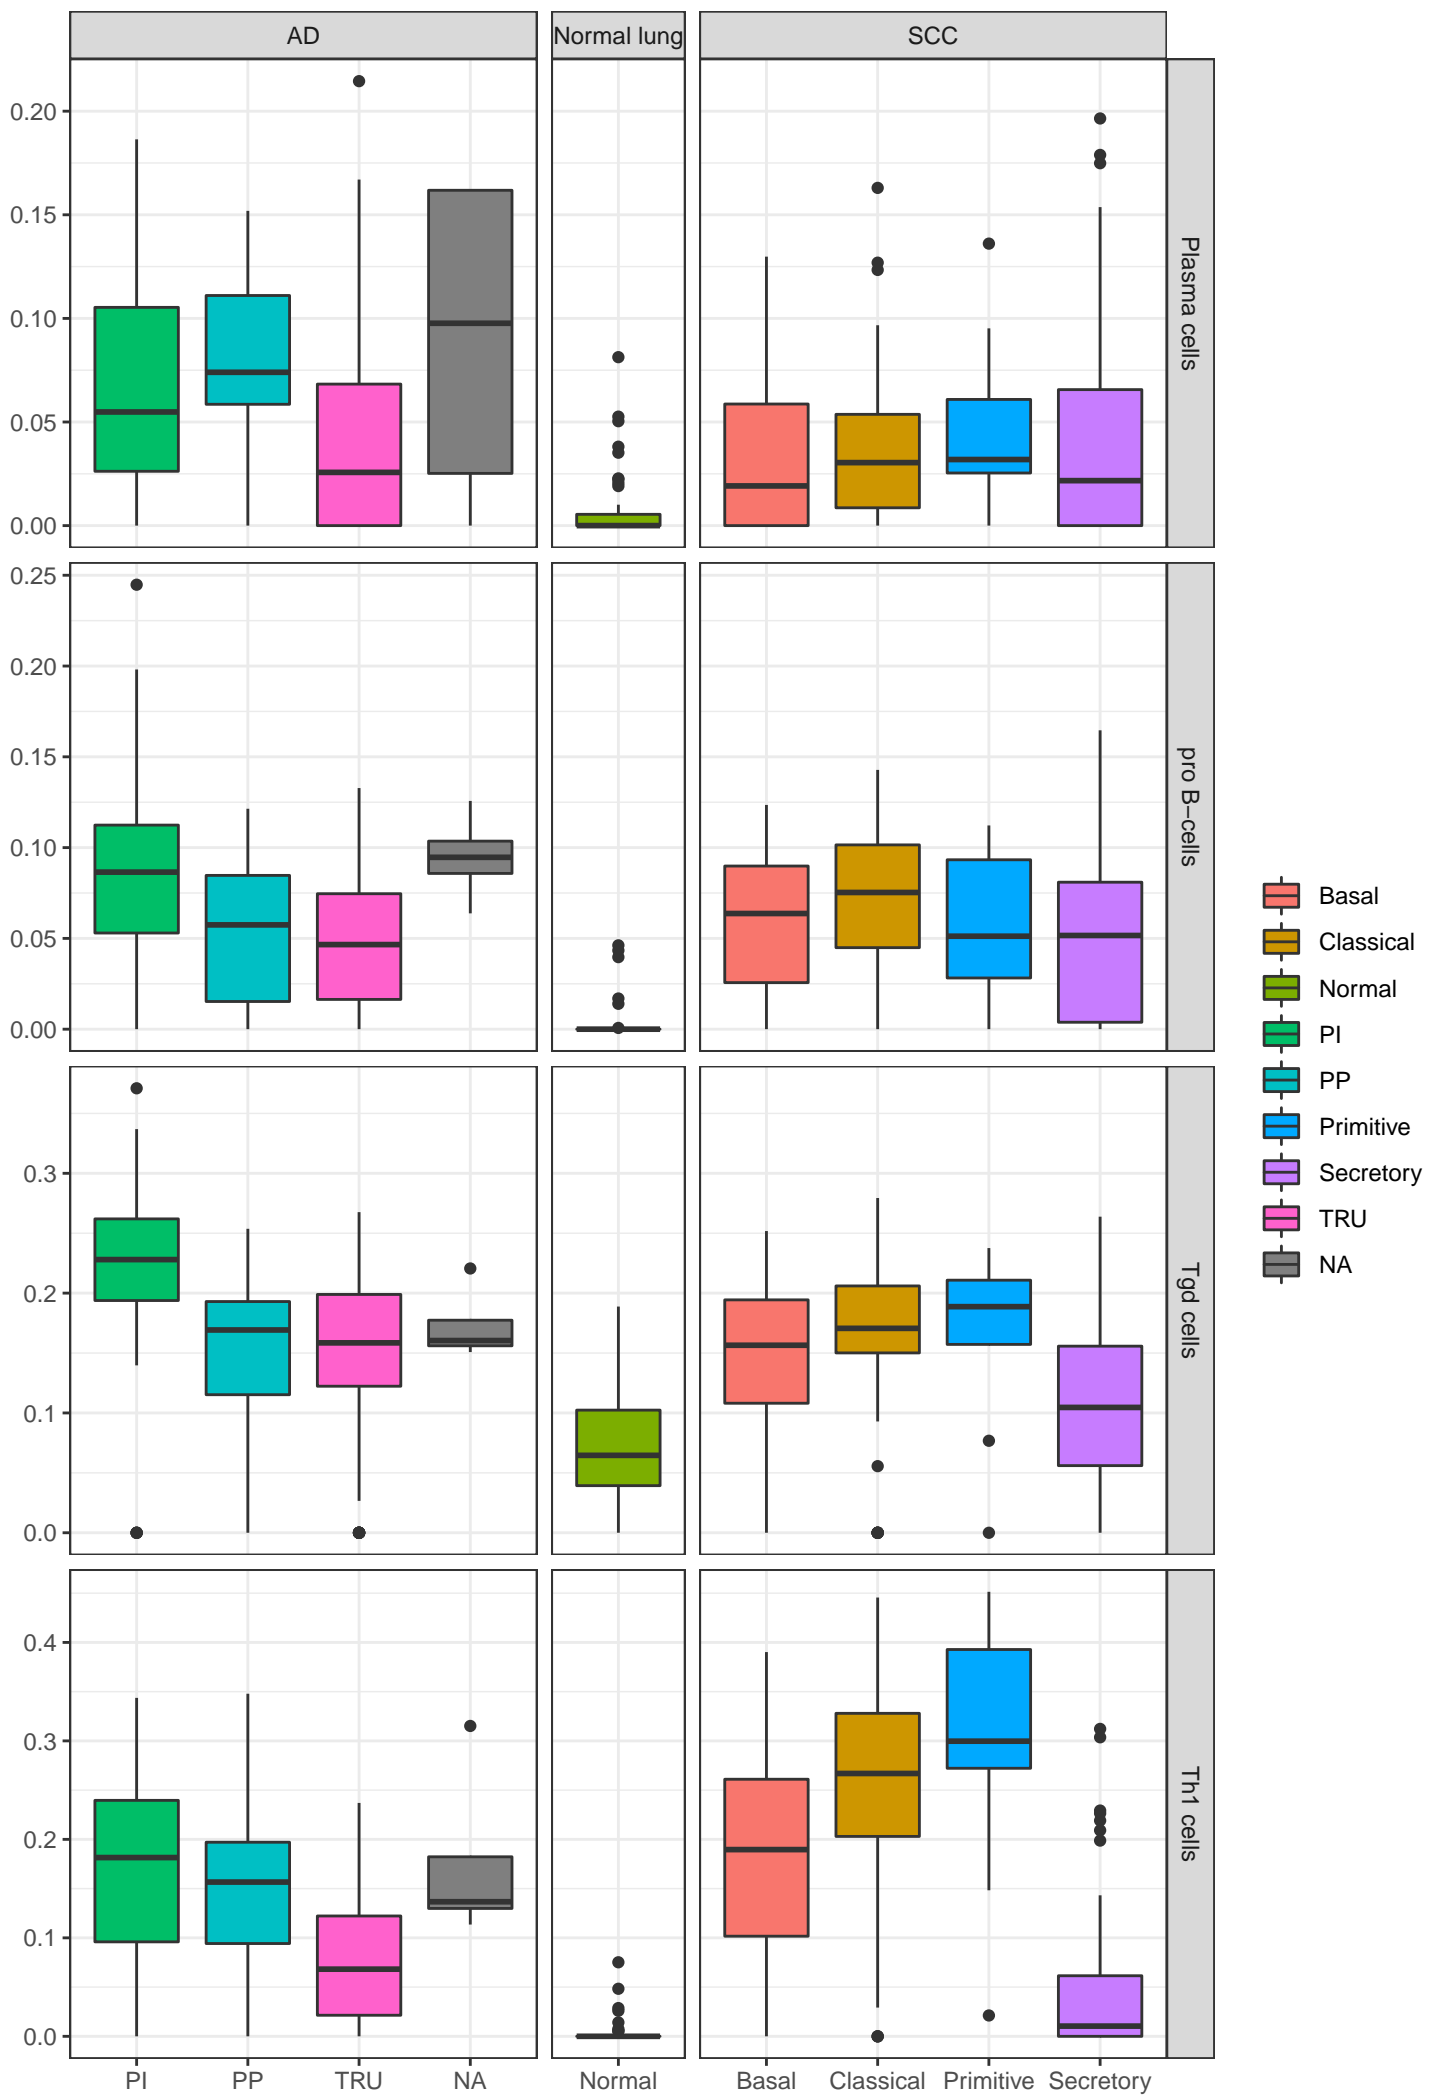



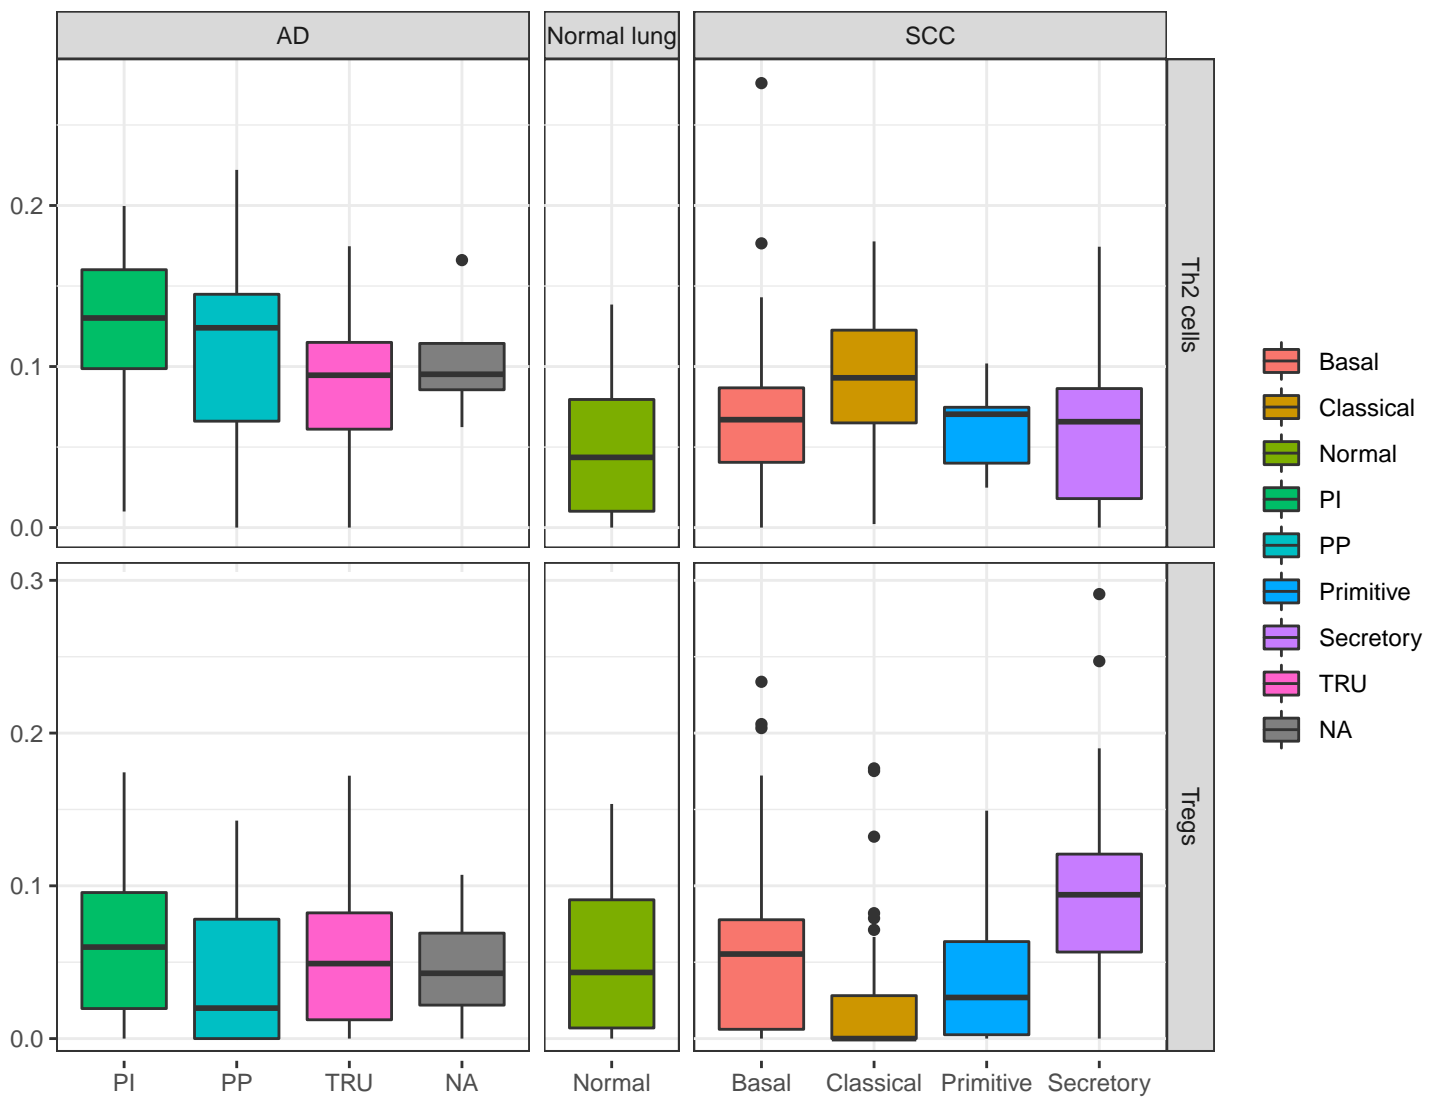

Supplement: MOL2-13-1166-s002.pdf [file MOL2-13-1166-s002.pdf]
